# Supplementary material
Source: publisher site journal article supplement (https://www.dovepress.com/article/387543)
Supplement: Supplementary file 1 [file get_supplementary_file.php]

| **Supplementary Table 1.** The perioperative opioids consumption | | | |
| --- | --- | --- | --- |
|  | **Group A** | **Group B** | **P value** |
| Intraoperative dose of sufentanil (μg) | 44.1±6.6 | 45.4±7.5 | 0.282 |
| Intraoperative dose of remifentanil(mg) | 1.6±0.8 | 1.9±0.9 | 0.057 |
| Sufentanil dosage (μg) at POD1 | 39.4±14.9 | 40.2±14.3 | 0.820 |
| PCA bolus (times) at POD1 | 2.0 (1.0,6.0) | 1.0 (1.0,4.0) | *0.045 |
| Sufentanil dosage (μg) at POD2 | 66.6±31.2 | 77.7±29.6 | 0.133 |
| PCA bolus(times) at POD2 | 1.0(0.0,3.0) | 1.0 (0.0,2.0) | 0.185 |

Notes: Date were presented as mean± SD and median (interquartile range, IQR)；POD1: 24 hours post operation; POD2: 48 hours post operation; PCA: Patient controlled anesthesia. *p＜0.05.

**Supplementary Table 2.** Postoperative adverse events and satisfaction rating (5-point Likert scale)

| **Variables** | **Group A** | **Group B** | **P value** |
| --- | --- | --- | --- |
| PON | 32/69(46.4%) | 21/69(30.4%) | 0.081 |
| POV | 19/69(27.5%) | 14/69(20.3%) | 0.318 |
| Shoulder-back pain | 14/69(20.3%) | 13/69(18.8%) | 0.830 |
| Satisfaction score for pain management | | | |
| at discharge day | 4.3±0.7 | 4.4±0.7 | 0.336 |
| at POM3 | 4.6±0.5 | 4.8±0.3 | *0.034 |
| at POM6 | 4.8±0.4 | 4.9±0.3 | 0.106 |

Notes: Date were presented as mean±SD and number (%). PON: postoperative nausea; POV: postoperative vomiting; POM3: postoperative 3rd month; POM6: postoperative 6th month. *p＜0.05.

| **Supplementary Table 3. Treatments that the patients received at POM3** | | | |
| --- | --- | --- | --- |
| **Variables** | **Group A(n=22)** | **Group B(n=17)** | **P value** |
| Taking Oral medication | 15 | 12 | 1.000 |
| Celecoxib Capsules | 6 | 6 |  |
| Duration of medication(days) | 3.0(2.8,3.5) | 3.5(2.8,4.0) | 0.546 |
| Ibuprofen | 7 | 6 |  |
| Duration of medication(days) | 4.0(3.0,5.0) | 4.5(3.0,6.3) | 0.608 |
| Tramadol | 1 | 0 |  |
| Duration of medication(days) | 5.0 |  |  |
| Oxycodone | 1 | 0 |  |
| Duration of medication(days) | 3.0 |  |  |
| Refusing medication | 2 | 1 |  |

Notes: Data were presented as median (interquartile range, IQR). POM3: postoperative 3rd month;

**Supplementary Table 4.** Treatments that the patients received for at POM6

| **Variables** | **Group A(n=21)** | **Group B(n=10)** | **P value** |
| --- | --- | --- | --- |
| Taking Oral medication | 5 | 4 | 1.000 |
| Celecoxib Capsules | 2 | 1 |  |
| Duration of medication(days) | 4.0(3.0,4.0) | 3.0 | 0.480 |
| Ibuprofen | 3 | 3 |  |
| Duration of medication(days) | 3.0（2.0,3.0） | 2.0(2.0,2.0） | 0.637 |
| Tramadol | 0 | 0 |  |
| Days |  |  |  |
| Oxycodone | 0 | 0 |  |
| Days |  |  |  |
| Refuse medicine | 0 | 0 |  |

Notes: Data were presented as median (interquartile range, IQR). POM6: postoperative 6th month.
